# Supplementary material
Source: PubMed Central journal article supplement (PMC3635109)
Supplement: NIHMS166807-supplement-1.pdf [file NIHMS166807-supplement-1.pdf]

Table 1 (Supplement). Total Cortisol for Control and Dexamethasone-treated Groups

| Time (h)    | Treatment Group | Pre-Stimulation | Post-Stimulation ACTH |              |
|-------------|-----------------|-----------------|-----------------------|--------------|
|             |                 |                 | 1 $\mu$ g/animal      | 5 $\mu$ g/kg |
|             |                 |                 |                       |              |
| <b>-122</b> | <b>control</b>  | 54 $\pm$ 12     | 111 $\pm$ 17          | 242 $\pm$ 21 |
|             | L               | 54 $\pm$ 15     | 119 $\pm$ 14          | 290 $\pm$ 15 |
|             | H               | 60 $\pm$ 14     | 119 $\pm$ 12          | 290 $\pm$ 21 |
| <b>4</b>    | <b>control</b>  | 74 $\pm$ 21     | 152 $\pm$ 21          | 332 $\pm$ 61 |
|             | L               | 122 $\pm$ 48    | 217 $\pm$ 98          | 345 $\pm$ 45 |
|             | H               | 138 $\pm$ 60    | 222 $\pm$ 94          | 336 $\pm$ 59 |
| <b>11</b>   | <b>control</b>  | 94 $\pm$ 33     | 262 $\pm$ 49          | 351 $\pm$ 36 |
|             | L               | 53 $\pm$ 28     | 235 $\pm$ 51          | 371 $\pm$ 27 |
|             | H               | 91 $\pm$ 34     | 295 $\pm$ 57          | 429 $\pm$ 49 |
| <b>24</b>   | <b>control</b>  | 63 $\pm$ 34     | 165 $\pm$ 49          | 371 $\pm$ 78 |
|             | L               | 16 $\pm$ 7      | 205 $\pm$ 83          | 351 $\pm$ 39 |
|             | H               | 38 $\pm$ 9      | 210 $\pm$ 8           | 438 $\pm$ 49 |
| <b>48</b>   | <b>control</b>  | 31 $\pm$ 4      | 92 $\pm$ 11           | 295 $\pm$ 27 |
|             | L               | 12 $\pm$ 3      | 62 $\pm$ 9            | 264 $\pm$ 17 |
|             | H               | 21 $\pm$ 5      | 101 $\pm$ 17          | 326 $\pm$ 33 |
| <b>72</b>   | <b>control</b>  | 26 $\pm$ 4      | 113 $\pm$ 25          | 337 $\pm$ 46 |
|             | L               | 9 $\pm$ 2       | 57 $\pm$ 7            | 263 $\pm$ 3  |
|             | H               | 16 $\pm$ 3      | 88 $\pm$ 27           | 294 $\pm$ 66 |
| <b>96</b>   | <b>control</b>  | 47 $\pm$ 27     | 116 $\pm$ 47          | 290 $\pm$ 45 |
|             | L               | 11 $\pm$ 5      | 45 $\pm$ 9            | 171 $\pm$ 25 |
|             | H               | 14 $\pm$ 3      | 50 $\pm$ 12           | 193 $\pm$ 22 |
